# Supplementary material
Source: HighWire-hosted journal article supplement (http://rc.rcjournal.com/highwire/filestream/16161/field_highwire_adjunct_files/0/suppl.pdf)
Supplement: suppl.pdf [file suppl.pdf]

**ONLINE SUPPLEMENT APPENDIX A**  
 Approach to Minimize Per-Patient Costs

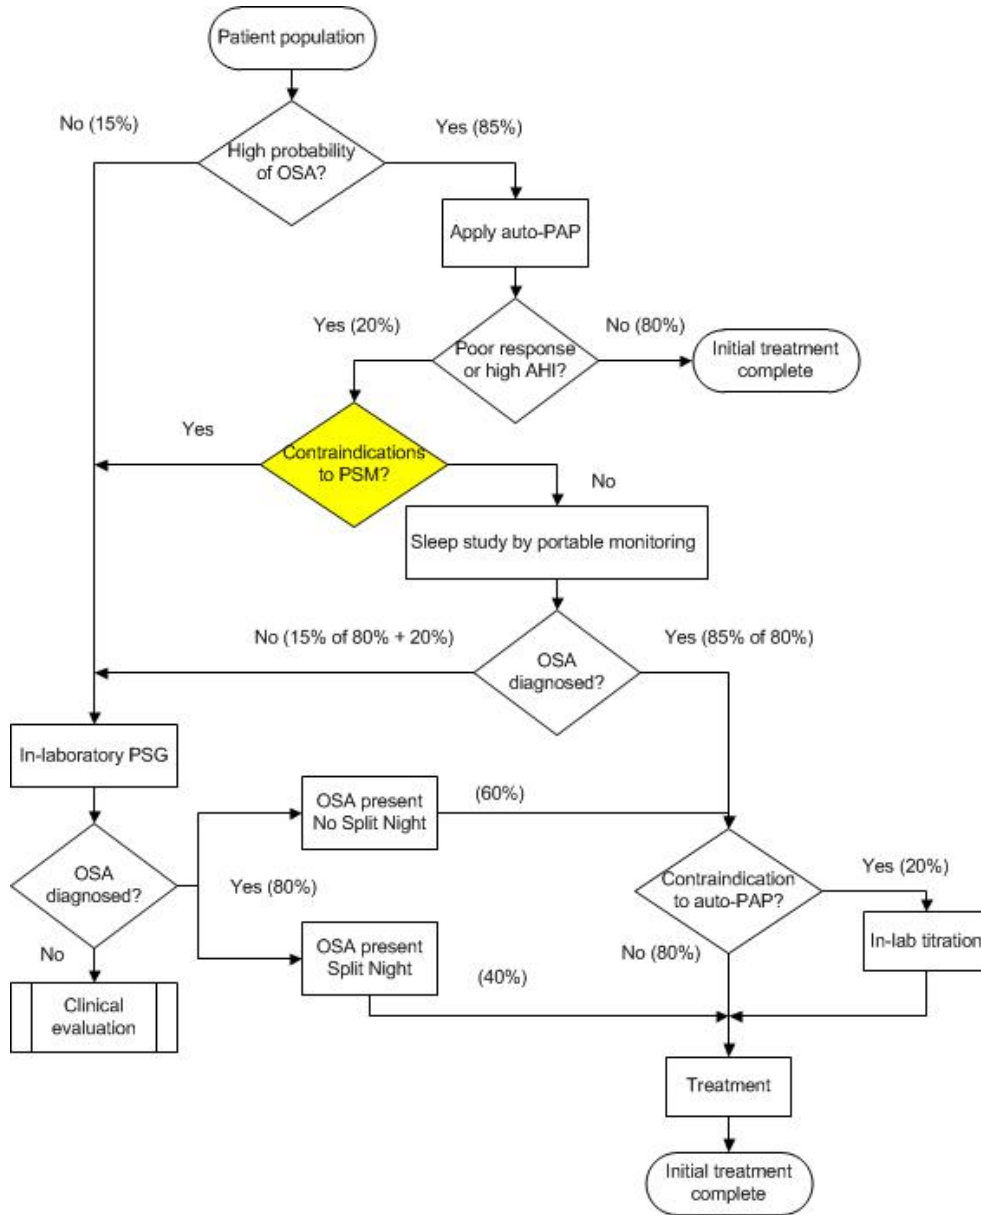

| Total Number of Sleep Studies                             | Supply Cost | Clinic Hours | Personnel Needed                                                                                         | Personnel Cost | Additional Rooms Needed   | Facility Operations Cost | Cost Per Patient (excluding facility startup cost)** | Facility Startup Cost | Cost Per Patient (including amortized facility cost) |
|-----------------------------------------------------------|-------------|--------------|----------------------------------------------------------------------------------------------------------|----------------|---------------------------|--------------------------|------------------------------------------------------|-----------------------|------------------------------------------------------|
| 525<br><i>Home: 193<br/>In-Lab: 78<br/>Titration: 108</i> | \$94,000    | 491          | Sleep MD: 0.31<br>Sleep RN: 0.12<br>Tech (Day+Night): 0.79<br>Lab Scorer: 0.36<br>Office Assistant: 0.11 | \$299,994      | Sleep: 1<br>Monitoring: 1 | \$11,000                 | \$390                                                | \$55,3614             | \$460                                                |
